# Supplementary material for: Establishment of markerless gene deletion tools in thermophilic Bacillus smithii and construction of multiple mutant strains
Source: PubMed Central journal article supplement (PMC4494709; doi:10.1186/s12934-015-0286-5), 2015-07-07

### Additional file 3.

*B. smithii*  $\Delta dhL$ - $\Delta sigF$  after counter-selection on plates containing 100  $\mu\text{g}/\text{mL}$  X-gal. Blue colonies still contain the plasmid-encoded *lacZ* gene and are smaller than the white colonies. White colonies have lost the plasmid and thus are not inhibited by the high concentration of the X-gal cleavage product.

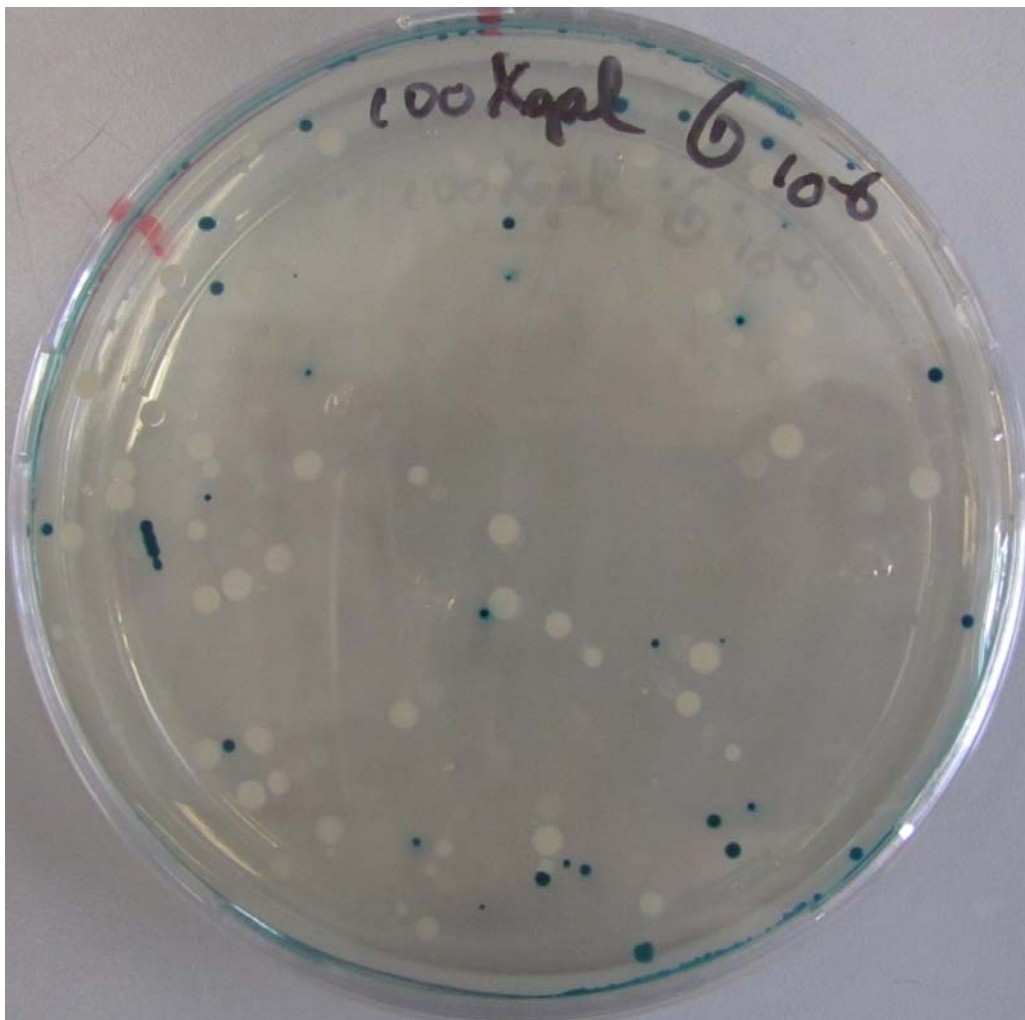

Supplement: 12934_2015_286_MOESM3_ESM.pdf [file 12934_2015_286_MOESM3_ESM.pdf]
