# Supplementary material for: Establishment of markerless gene deletion tools in thermophilic Bacillus smithii and construction of multiple mutant strains
Source: PubMed Central journal article supplement (PMC4494709; doi:10.1186/s12934-015-0286-5), 2015-07-07
Supplement: 12934_2015_286_MOESM4_ESM.pdf [file 12934_2015_286_MOESM4_ESM.pdf]

#### Additional file 4.

#### Fermentation analysis of *B. smithii* ET 138 wild-type and mutant strains in 1 L pH-controlled bioreactors after $\pm 24$ h.

| ET 138 strain                         | Products (mM) <sup>1</sup> |       |      |                 |      |       | OD <sub>600</sub> |
|---------------------------------------|----------------------------|-------|------|-----------------|------|-------|-------------------|
|                                       | Lac                        | Ace   | Pyr  | Mal             | Suc  | Total |                   |
| wild-type                             | 73.14                      | 3.97  | 0.34 | 2.67            | 0.34 | 80.46 | 0.891             |
| $\Delta ldhL$                         | 1.82                       | 3.72  | 3.15 | 1.19            | 0.12 | 10.01 | 0.251             |
| $\Delta ldhL \Delta sigF$             | 1.17                       | 3.42  | 2.18 | 0.12            | 1.56 | 8.46  | 0.232             |
| $\Delta ldhL \Delta sigF \Delta pdhA$ | 1.03                       | -1.33 | 6.43 | nd <sup>2</sup> | 0.15 | 7.60  | 0.236             |

Cells were grown for 22.5 h (wild-type, single and double mutant) or 28 h (triple mutant) in 1 L TVMY medium containing 30 g/L glucose in a 2 L reactor at 55°C and pH 6.5, without any gas additions.

<sup>1</sup> Abbreviations: Lac: lactate, Ace: acetate, Pyr: pyruvate, Mal: malate, Suc: succinate.

<sup>2</sup> nd: not determined: in the case of strain  $\Delta ldhL \Delta sigF \Delta pdhA$ , malate could not be separated precisely from pyruvate due to high pyruvate concentrations.
